# Supplementary material for: Omni-directional light capture in PERC solar cells enhanced by stamping hierarchical structured silicone encapsulation that mimics leaf epidermis
Source: Royal Society of Chemistry journal article supplement (doi:10.1039/d0ra03378b), 2020-01-01
Supplement: d0ra03378b1.pdf [file d0ra03378b1.pdf]

# **Omni-directional Light Capture in PERC Solar Cells Enhanced by Hierarchical Structured Silicone Encapsulation that Mimic Leaf Epidermis**

**Min Ju Yun<sup>1</sup>, Yeon Hyang Sim<sup>1,2</sup>, Dong Y. Lee<sup>1</sup> and Seung I. Cha<sup>\*1,2</sup>,**

**1. Energy Conversion Research Center, Electrical Materials Research Division, Korea  
Electrotechnology Research Institute**

**2. Department of Electro-functionality Materials Engineering, University of Science and  
Technology**

**Supporting Information**

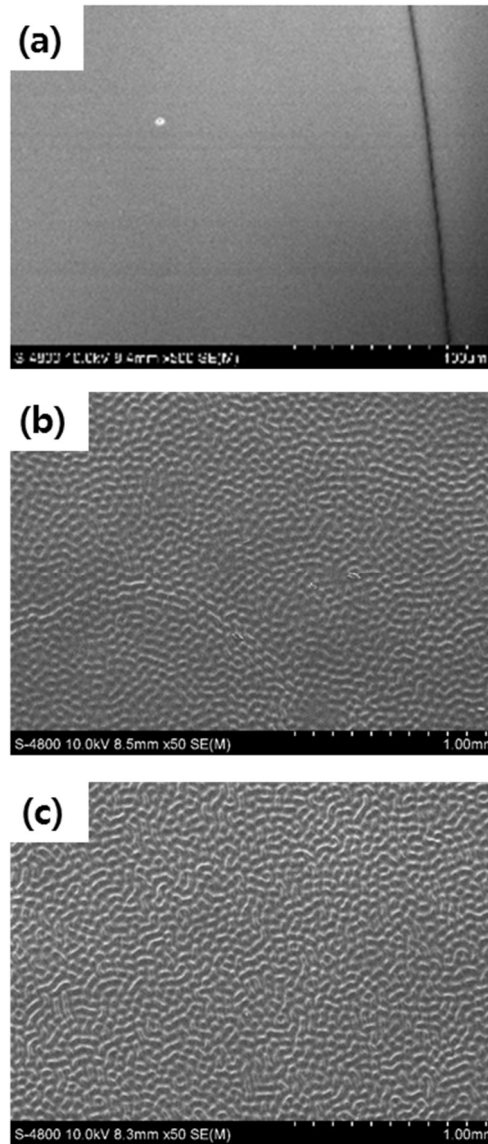

**Figure S1.** SEM micrographs of PDMS surface after silane treatments with conditions of (a) 0.04ml, 3hours, (b) 0.4 ml, 3hours and (c) 0.4ml, 5hours

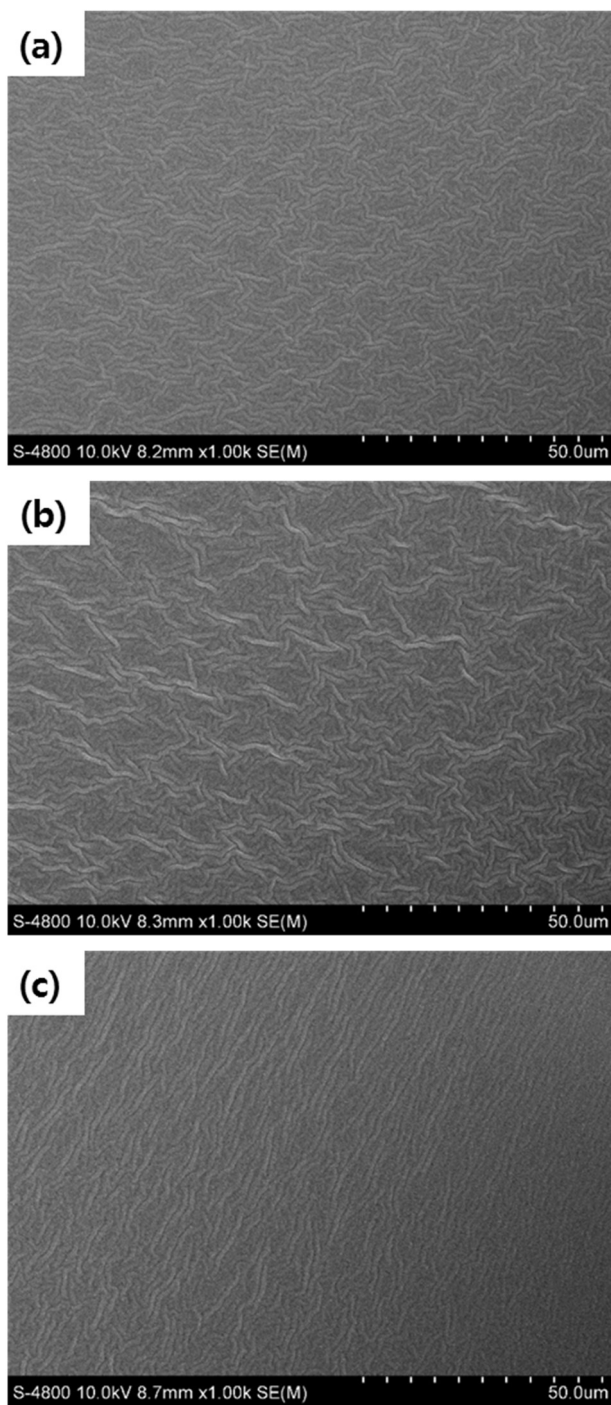

**Figure S2.** SEM micrographs of PDMS after ozone treatment for (a) 10 minutes, (b) 30 minutes and (c) 60 minutes.

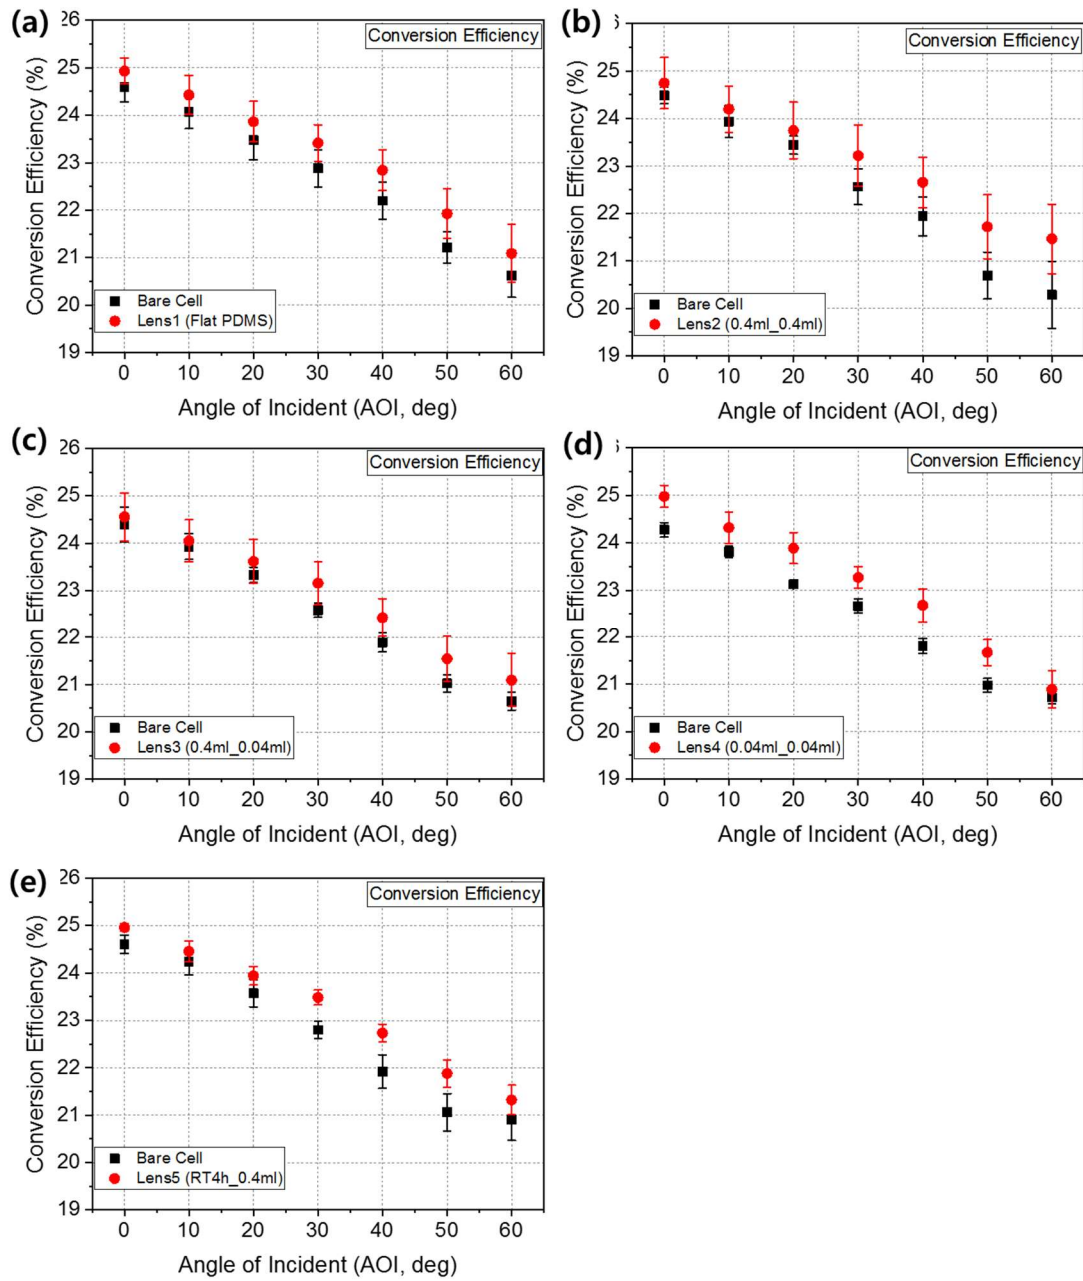

**Figure S3.** The variation of energy conversion efficiency according to AOI for (a) Struct. 1, (b) Struct. 2, (c) Struct. 3, (d) Struct. 4 and (e) Struct. 5 patterned PDMS encapsulated PERC solar cells.

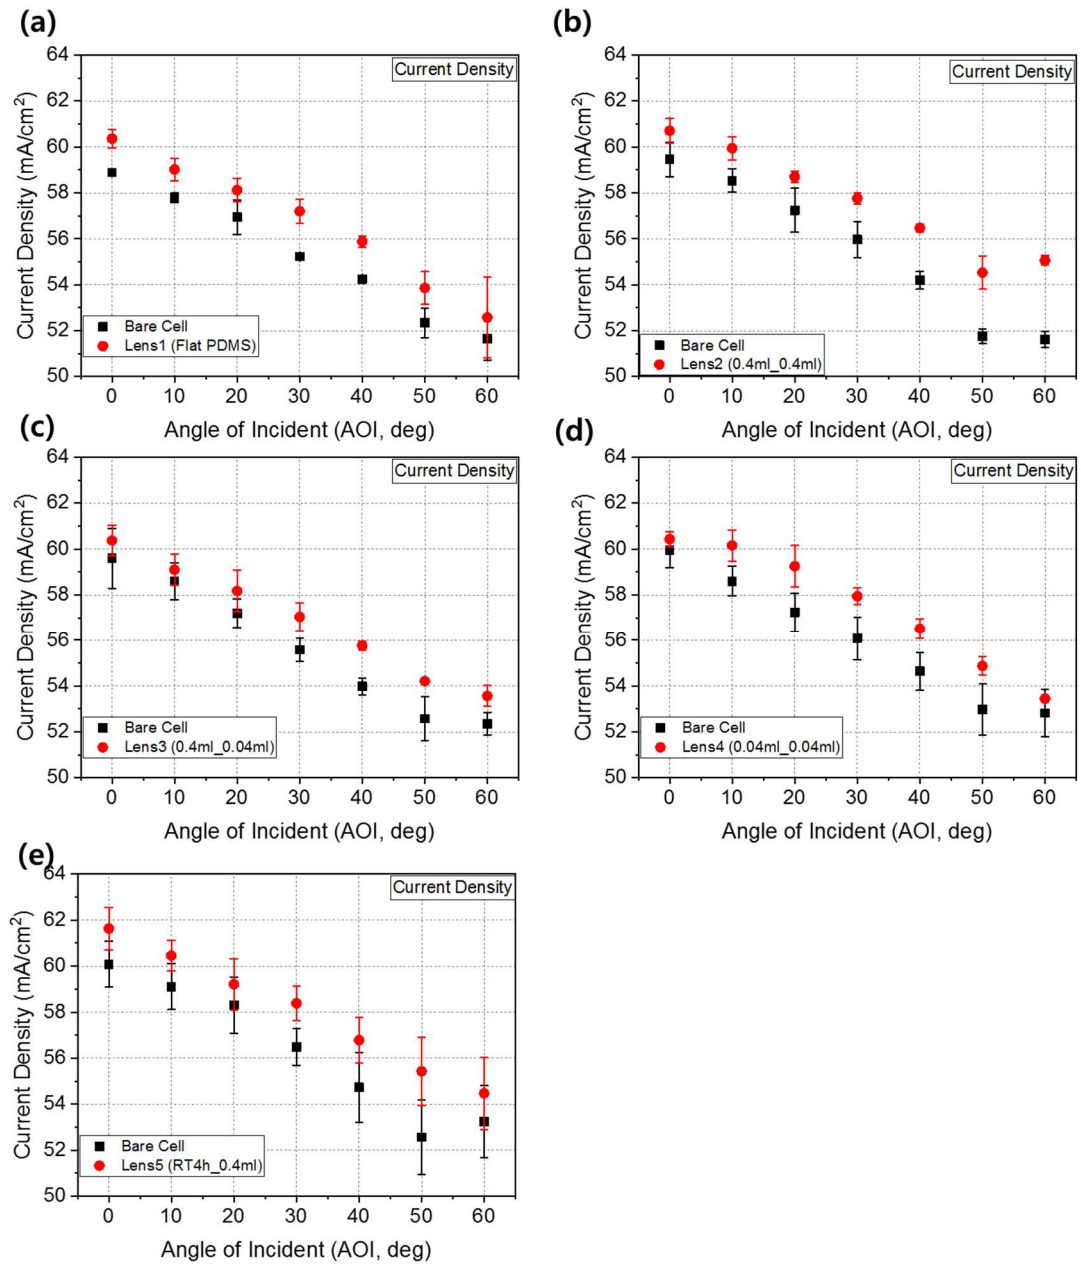

**Figure S4.** The variation of short circuit current density according to AOI for (a) Struct. 1, (b) Struct. 2, (c) Struct. 3, (d) Struct. 4 and (e) Struct. 5 patterned PDMS encapsulated PERC solar cells.
